# Supplementary material
Source: PubMed Central journal article supplement (PMC2724591)
Supplement: NIHMS128735-supplement-gels.pdf [file NIHMS128735-supplement-gels.pdf]

## Supporting Information

### Effects of tryptophan microenvironment, soluble domain, and vesicle size on the thermodynamics of membrane protein folding: Lessons from the transmembrane protein OmpA

*Sanchez, K.M., Gable, J.G., Schlamadinger, D.E., Kim, J.E.*

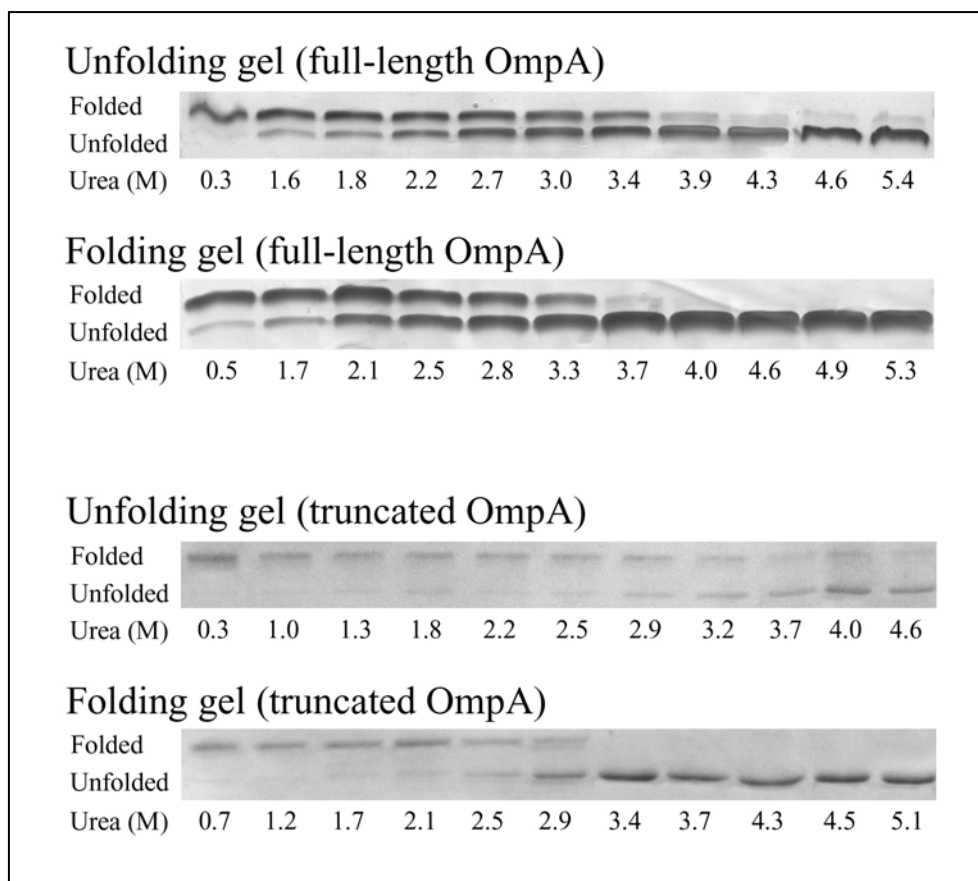

**Figure S1.** Unfolding and folding gel-shift assays of representative full-length (top) and truncated (bottom) single-trp mutants of OmpA. The  $C_m$  values determined from the fluorescence studies was 3.1 M urea for the full-length mutant and 2.3 M for the truncated mutant. See main text for additional details.
